# Supplementary material for: Synthesis and Biological Evaluation of Novel Indole-Derived Thioureas
Source: PubMed Central journal article supplement (PMC6222422; doi:10.3390/molecules23102554), 2018-10-07

## Supplementary material

**Figure 1S.** View of conformers observed in solid for molecules **8** (top) and **28** (bottom). Displacement ellipsoids drawn at 50% probability level.

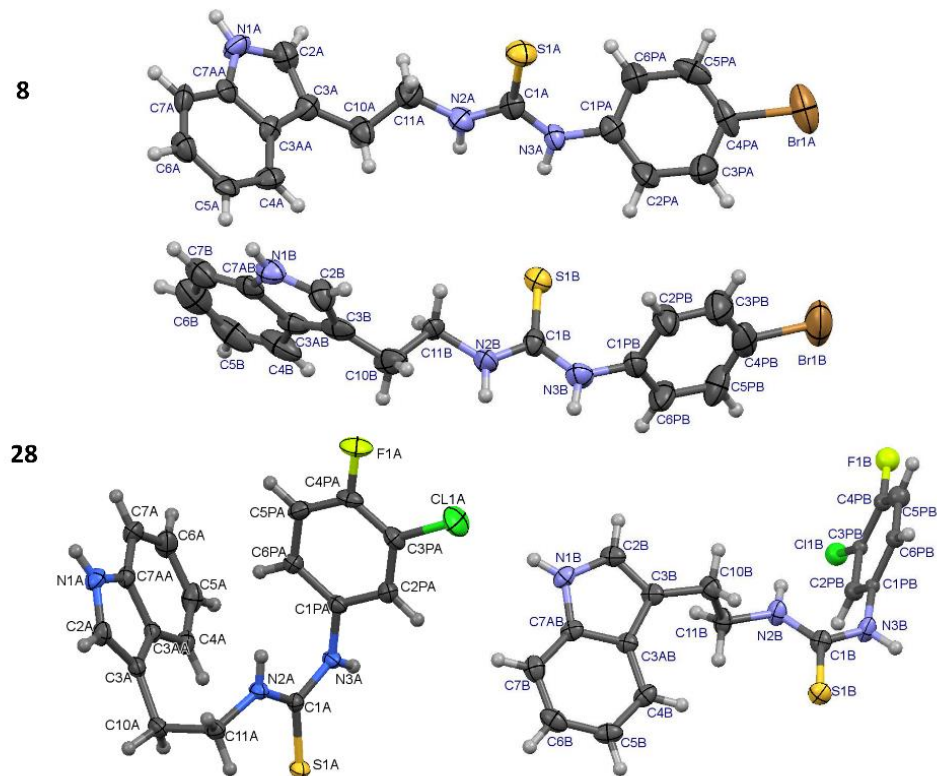

**Figure 1S.** View of conformers observed in solid for molecules **8** (top) and **28** (bottom). Displacement ellipsoids drawn at 50% probability level. Both compounds are conformationally unstable which is observed in the solid. The molecules **8** and **28** crystallize as two conformers differing in the orientation of the thiourea and indole groups, and in the patterns of noncovalent intermolecular contacts.

**The  $^1\text{H}$  NMR,  $^{13}\text{C}$  NMR spectra of the selected compounds.**

**Spectrum 1.**  $^1\text{H}$  NMR of compd **6** (300 MHz, DMSO- $\text{d}_6$ ).

**Spectrum 2.**  $^{13}\text{C}$  NMR of compd **6** (75.4 MHz, DMSO- $\text{d}_6$ ).

**Spectrum 3.**  $^1\text{H}$  NMR of compd **8** (300 MHz, DMSO- $\text{d}_6$ ).

**Spectrum 4.**  $^{13}\text{C}$  NMR of compd **8** (75.4 MHz, DMSO- $\text{d}_6$ ).

**Spectrum 5.**  $^1\text{H}$  NMR of compd **14** (300 MHz, DMSO- $\text{d}_6$ ).

**Spectrum 6.**  $^{13}\text{C}$  NMR of compd **14** (75.4 MHz, DMSO- $\text{d}_6$ ).

**Spectrum 7.**  $^1\text{H}$  NMR of compd **15** (300 MHz, DMSO- $\text{d}_6$ ).

**Spectrum 8.**  $^{13}\text{C}$  NMR of compd **15** (75.4 MHz, DMSO- $\text{d}_6$ ).

**Spectrum 9.**  $^1\text{H}$  NMR of compd **19** (300 MHz, DMSO- $\text{d}_6$ ).

**Spectrum 10.**  $^{13}\text{C}$  NMR of compd **19** (75.4 MHz, DMSO- $\text{d}_6$ ).

Spectrum 1. <sup>1</sup>H NMR of compound 6 (300 MHz, DMSO-d<sub>6</sub>).

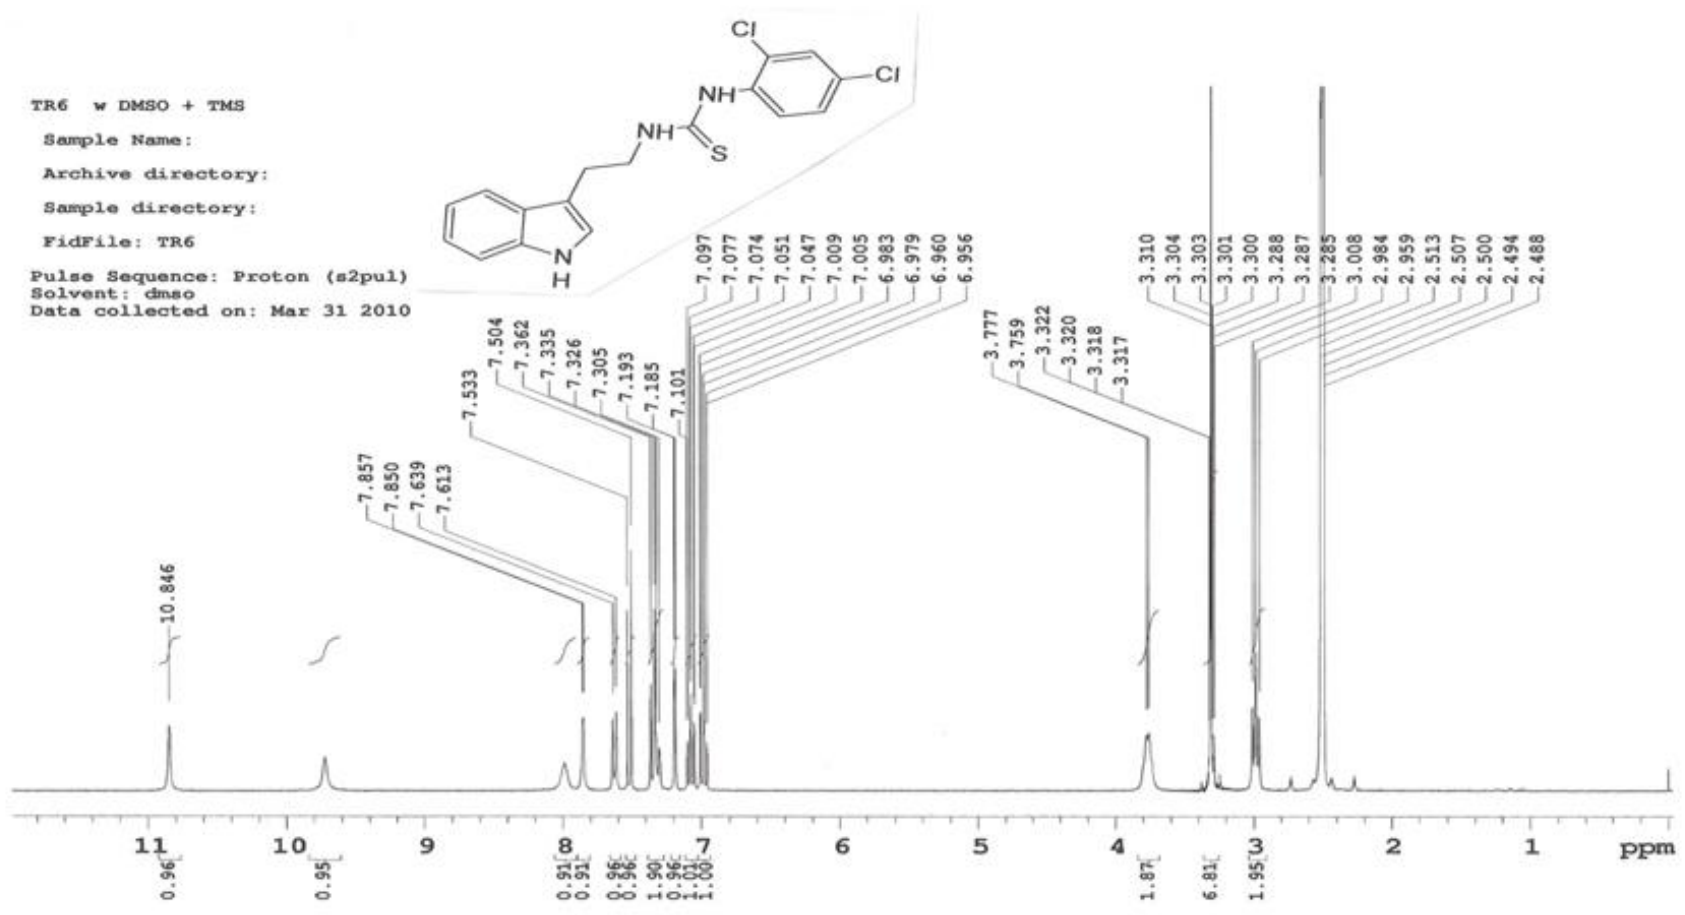

Spectrum 2. <sup>13</sup>C NMR of compound 6 (75.4 MHz, DMSO-d<sub>6</sub>).

TR 6 13C

Sample Name:

Data Collected on:  
wormhole-vnmrs300

Archive directory:

Sample directory:

FidFile: TR-6-13C

Pulse Sequence: Carbon (s2pul)

Solvent: dms0

Data collected on: Jan 2 2012

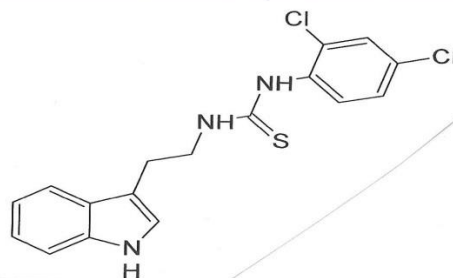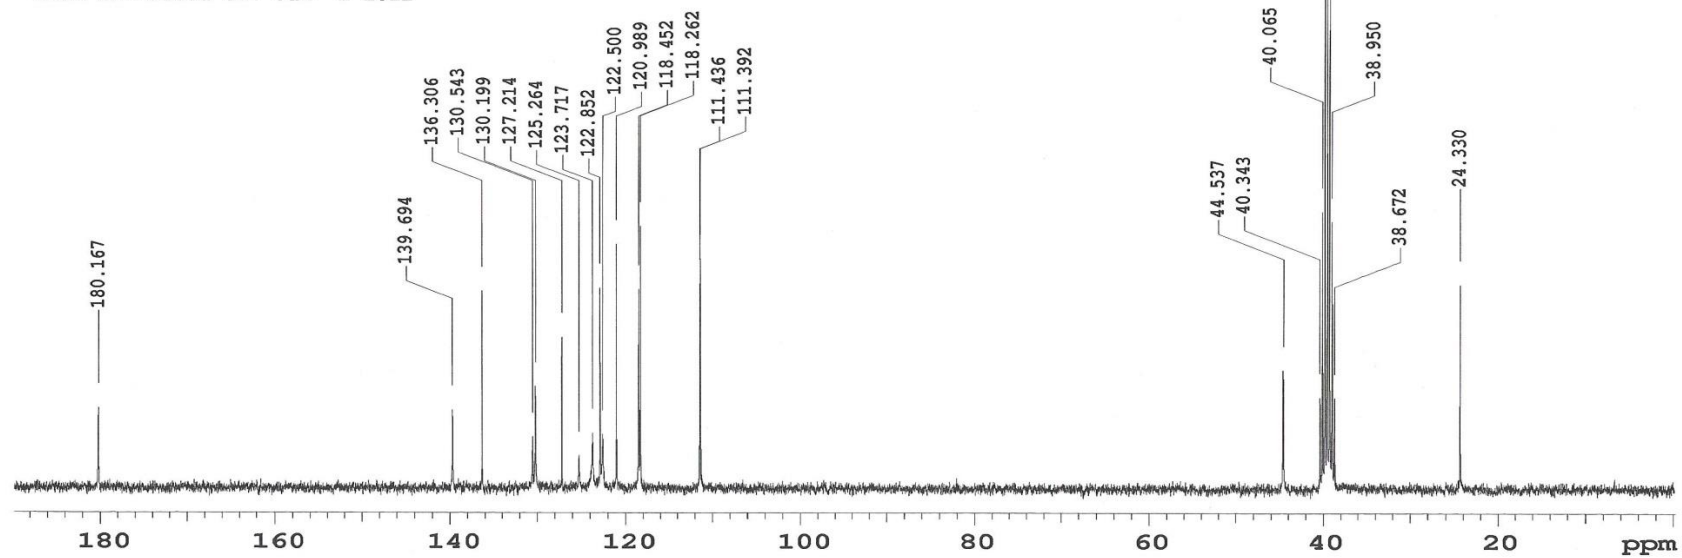

**Spectrum 3.**  $^1\text{H}$  NMR of compound **8** (300 MHz, DMSO- $d_6$ ).

TR 8

Sample Name:

Archive directory:

Sample directory:

FidFile: TR8

Pulse Sequence: Proton (s2pul)

Solvent: cdcl3

Data collected on: Mar 16 2010

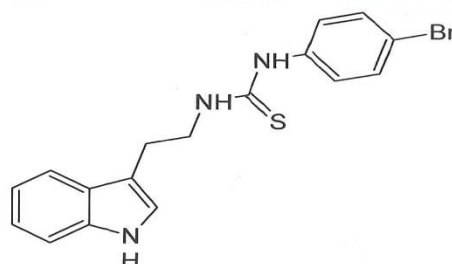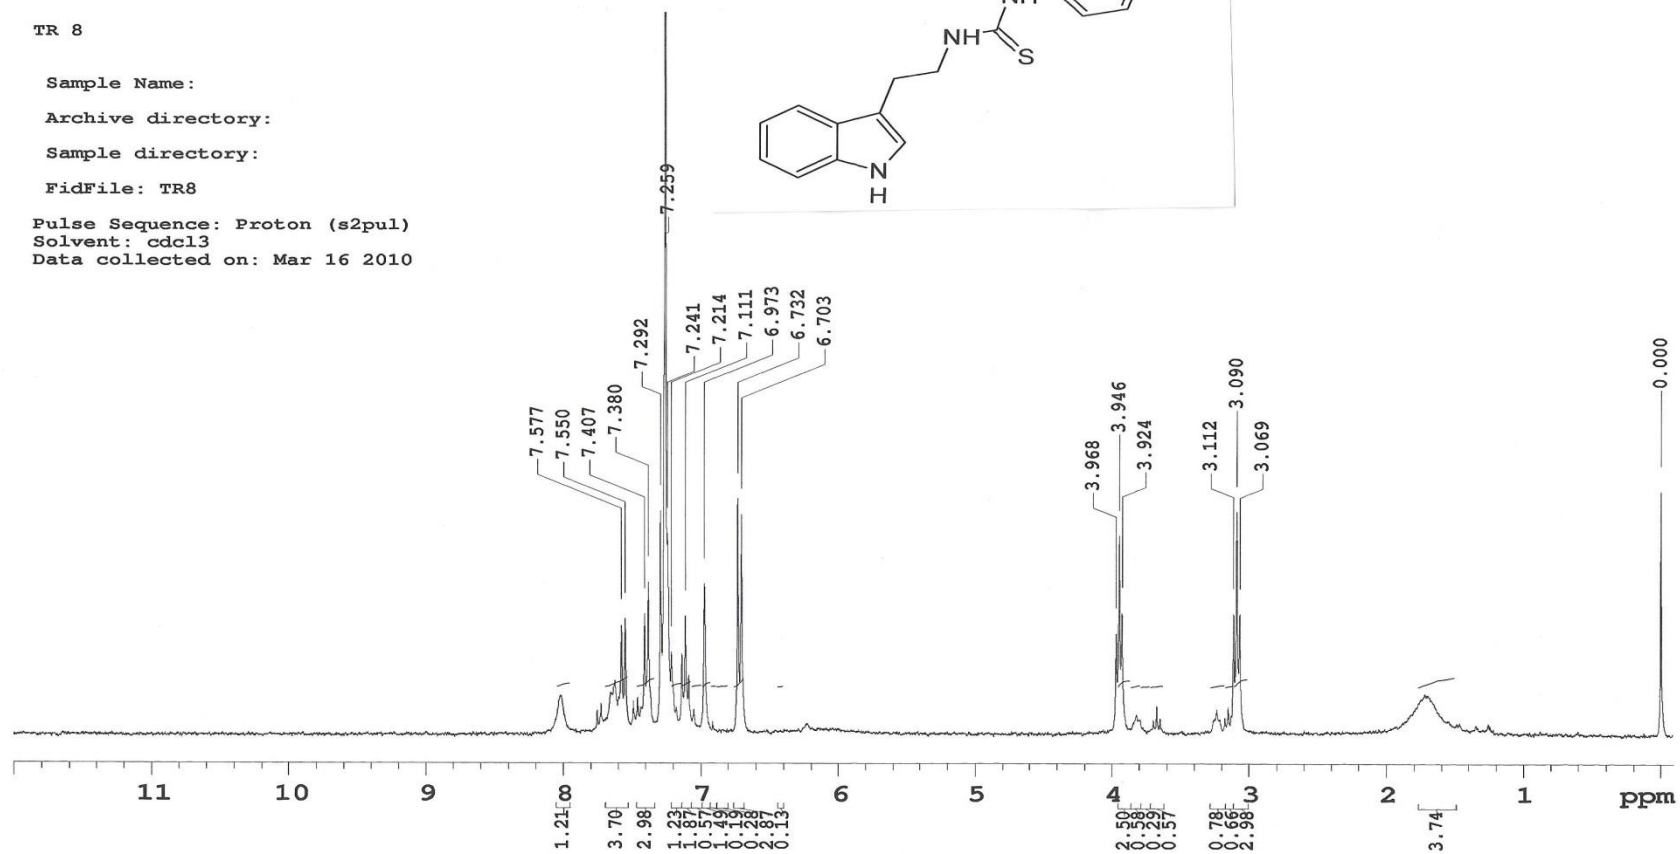

Spectrum 4.  $^{13}\text{C}$  NMR of compound **8** (75.4 MHz, DMSO- $d_6$ ).

TR 8 13C

Sample Name:

Data Collected on:  
wormhole-vnmrs300

Archive directory:

Sample directory:

FidFile: TR-8-13C

Pulse Sequence: Carbon (s2pul)  
Solvent: dms0  
Data collected on: Jan 2 2012

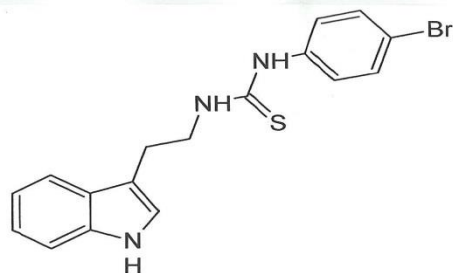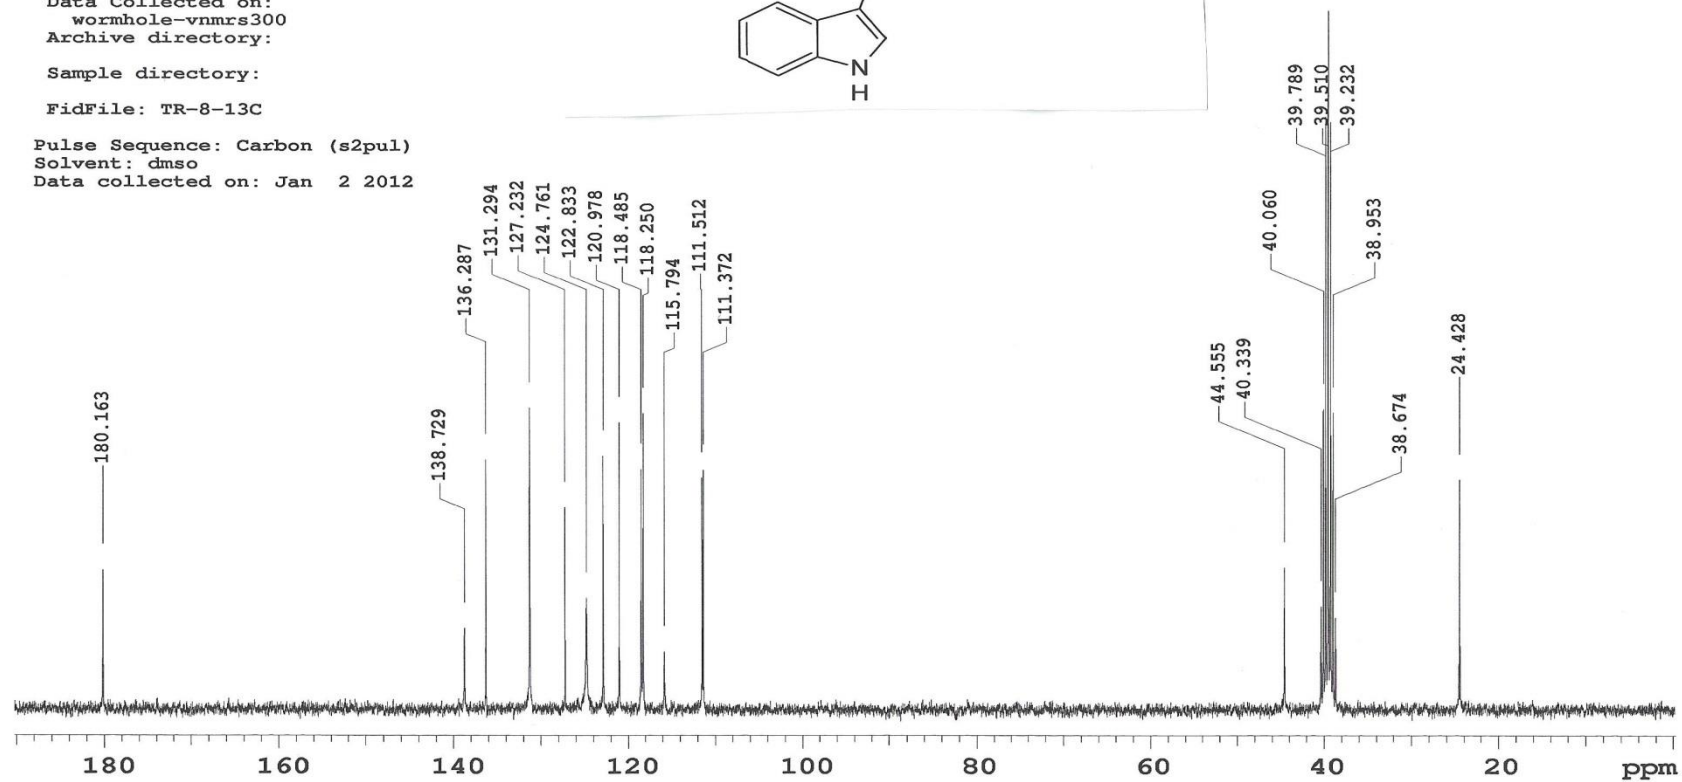

Spectrum 5. <sup>1</sup>H NMR of compound 14 (300 MHz, DMSO-d<sub>6</sub>).

TR14 w DMSO + TMS

Sample Name:

Archive directory:

Sample directory:

FidFile: TR14

Pulse Sequence: Proton (s2pul)

Solvent: dmsd

Data collected on: Mar 31 2010

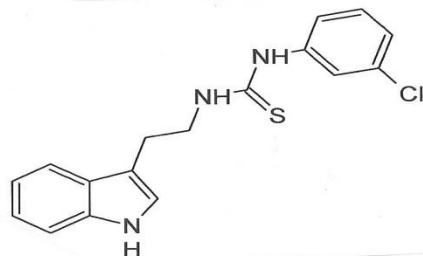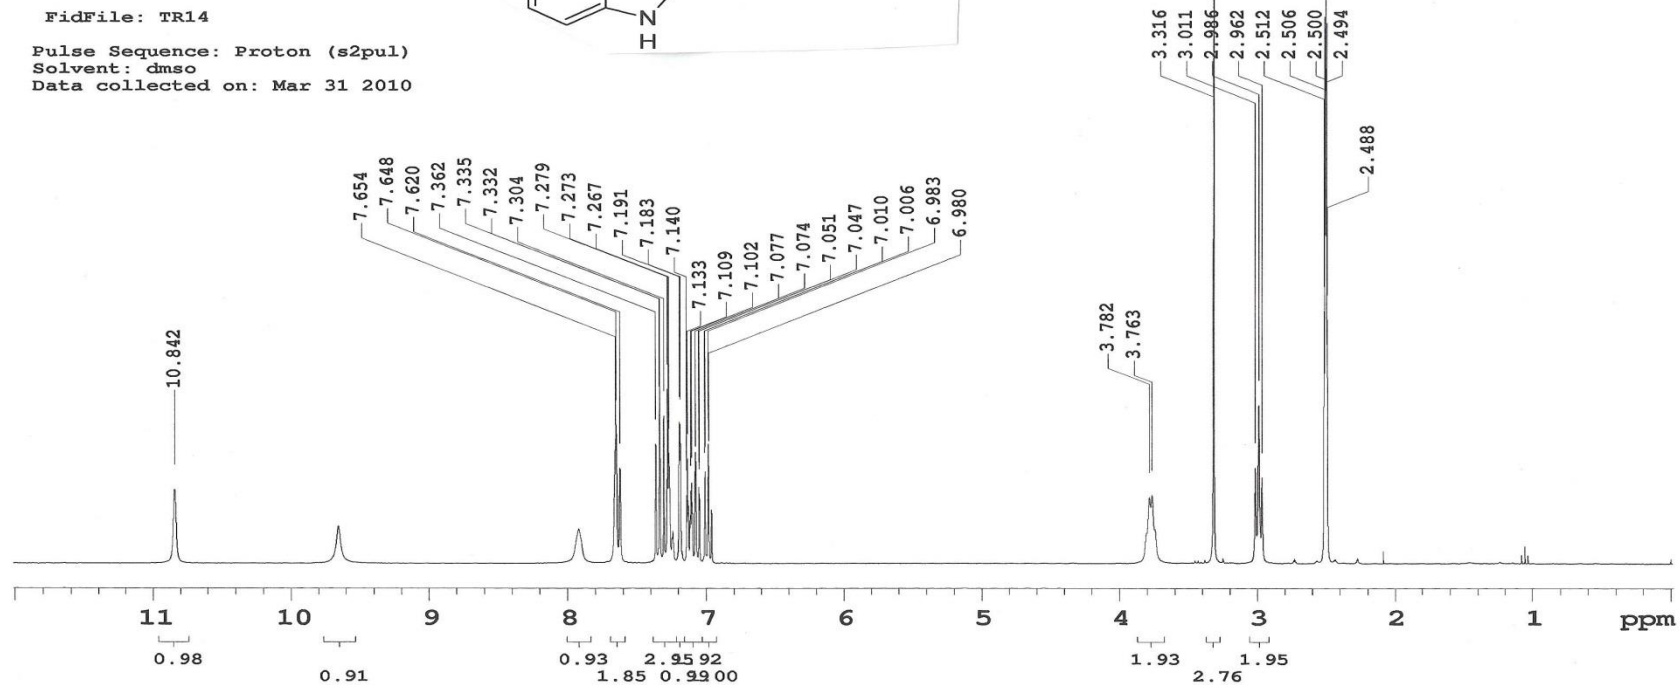

**Spectrum 6.**  $^{13}\text{C}$  NMR of compound **14** (75.4 MHz,  $\text{DMSO-d}_6$ ).

TR14 w DMSO 13C-NMR

Sample Name:

Data Collected on:  
wormhole-vnmrs300

Archive directory:

Sample directory:

FidFile: TR14-13C

Pulse Sequence: Carbon (s2pul)

Solvent: dms0

Data collected on: Jan 3 2012

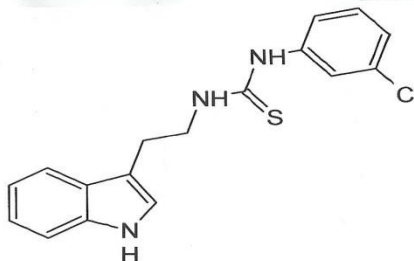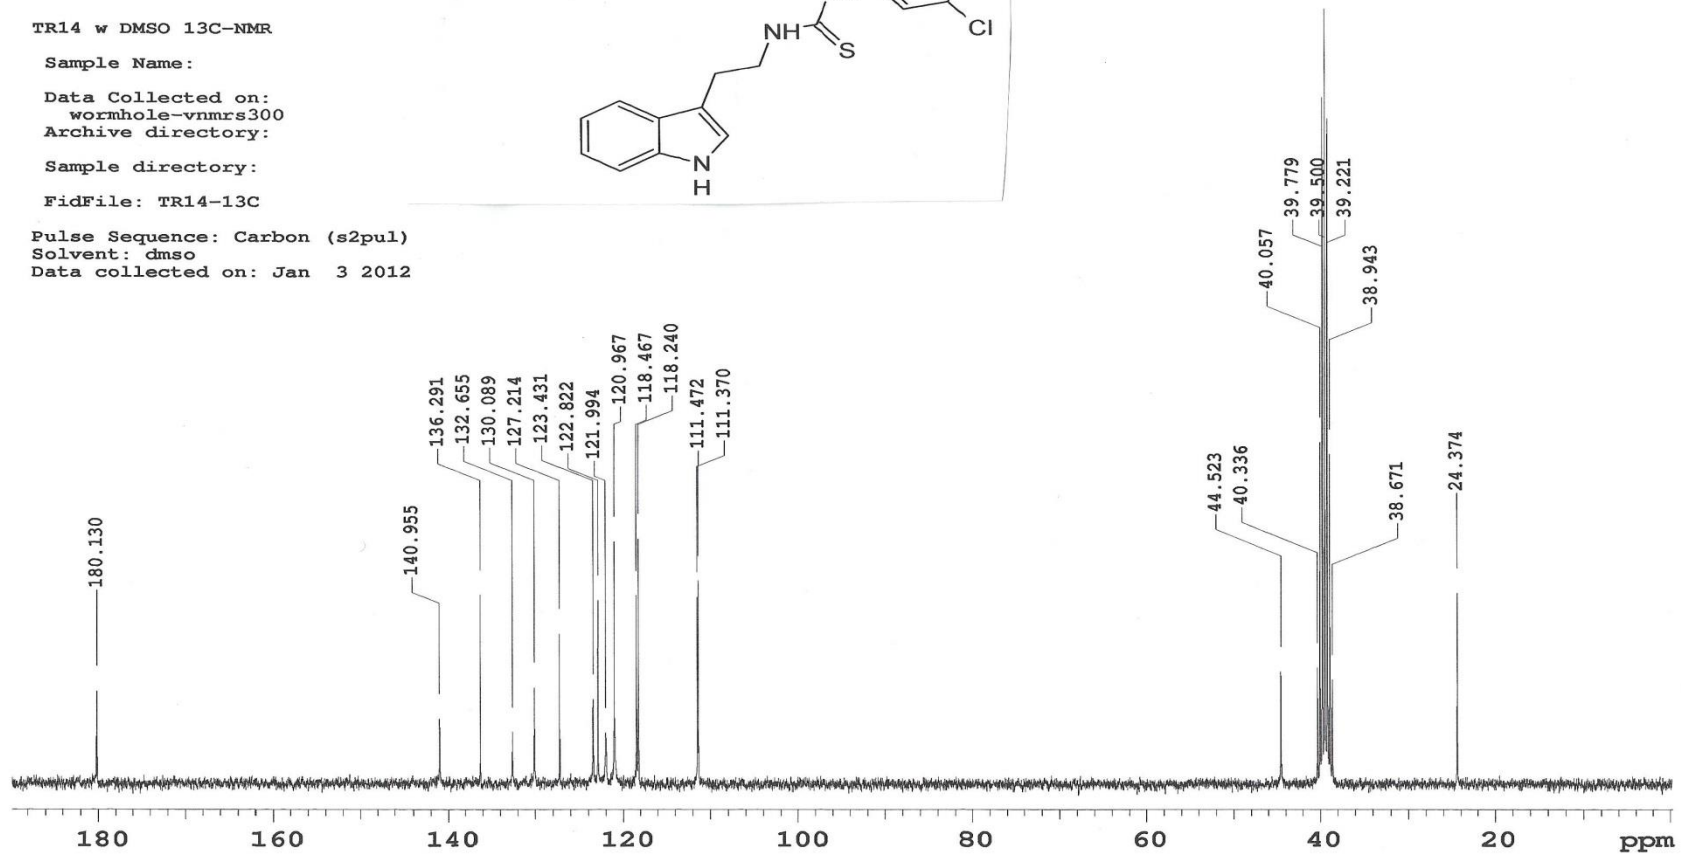



Spectrum 7. <sup>1</sup>H NMR of compound 15 (300 MHz, DMSO-d<sub>6</sub>).

DS Tr1 w DMSO + TMS

Sample Name:

Archive directory:

Sample directory:

FidFile: DSTr1

Pulse Sequence: Proton (s2pul)

Solvent: dms

Data collected on: Nov 4 2010

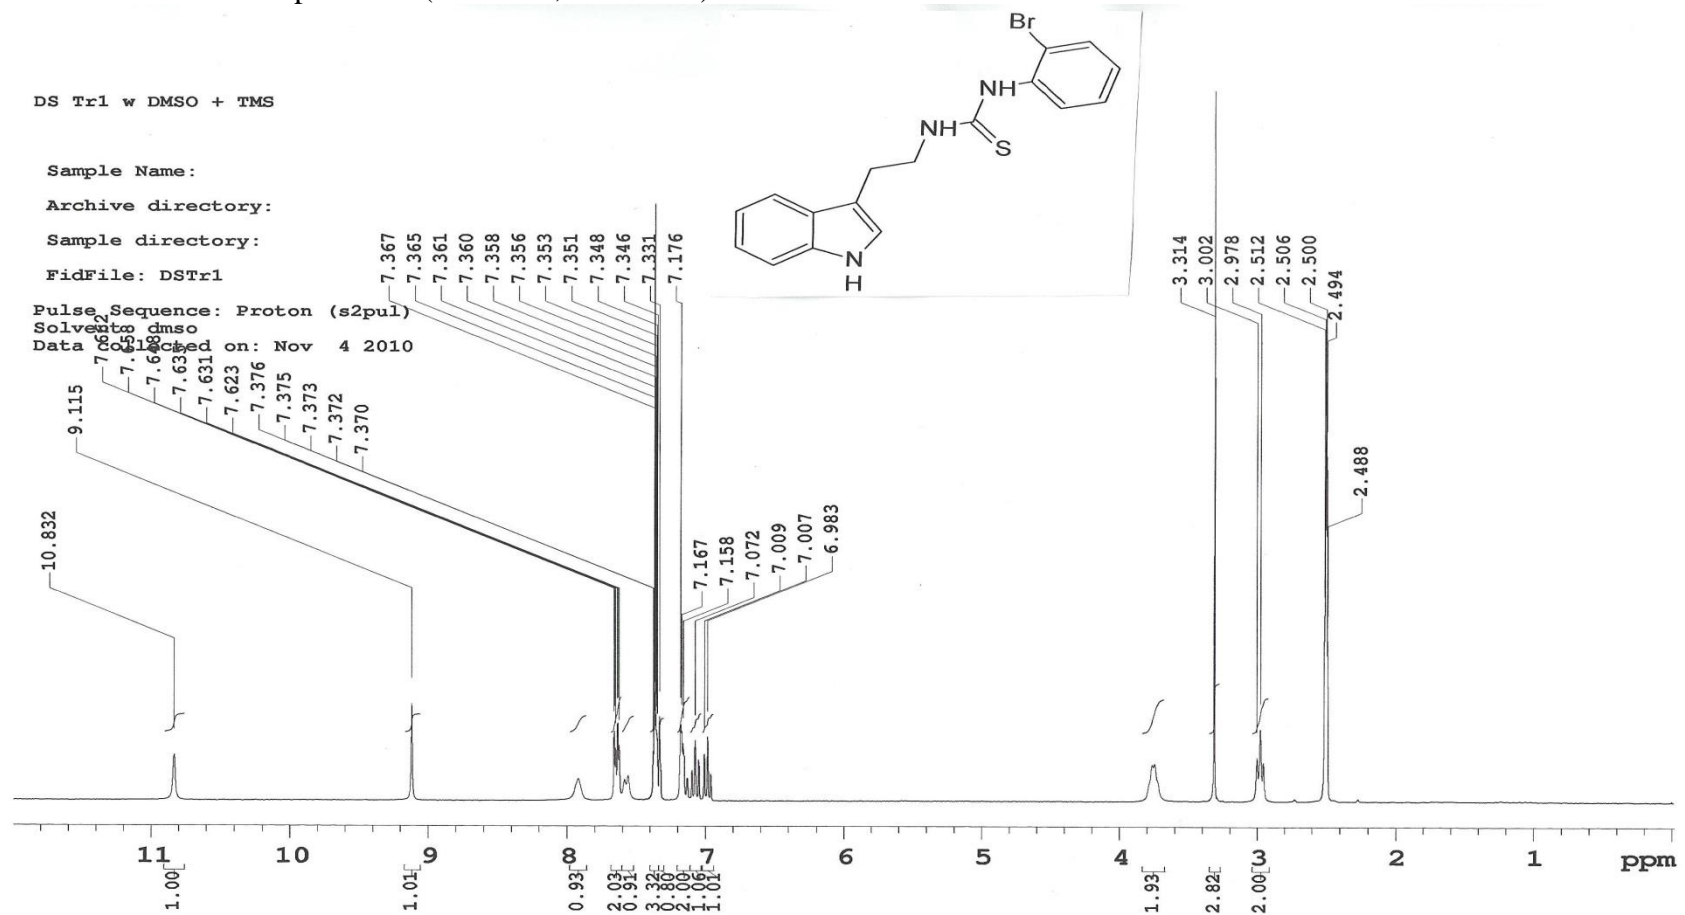

**Spectrum 8.**  $^{13}\text{C}$  NMR of compound **15** (75.4 MHz, DMSO- $\text{d}_6$ ).

TR-15  
DMSO 13C

Sample Name:

Data Collected on:  
wormhole-vnmrs300

Archive directory:

Sample directory:

FidFile: TR15-13C

Pulse Sequence: Carbon (s2pul)  
Solvent: dms0  
Data collected on: Jan 18 2012

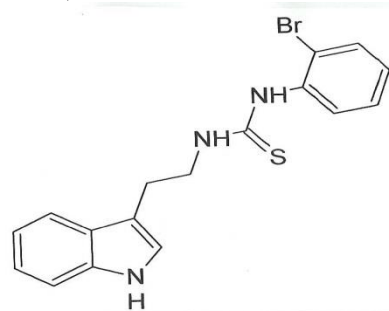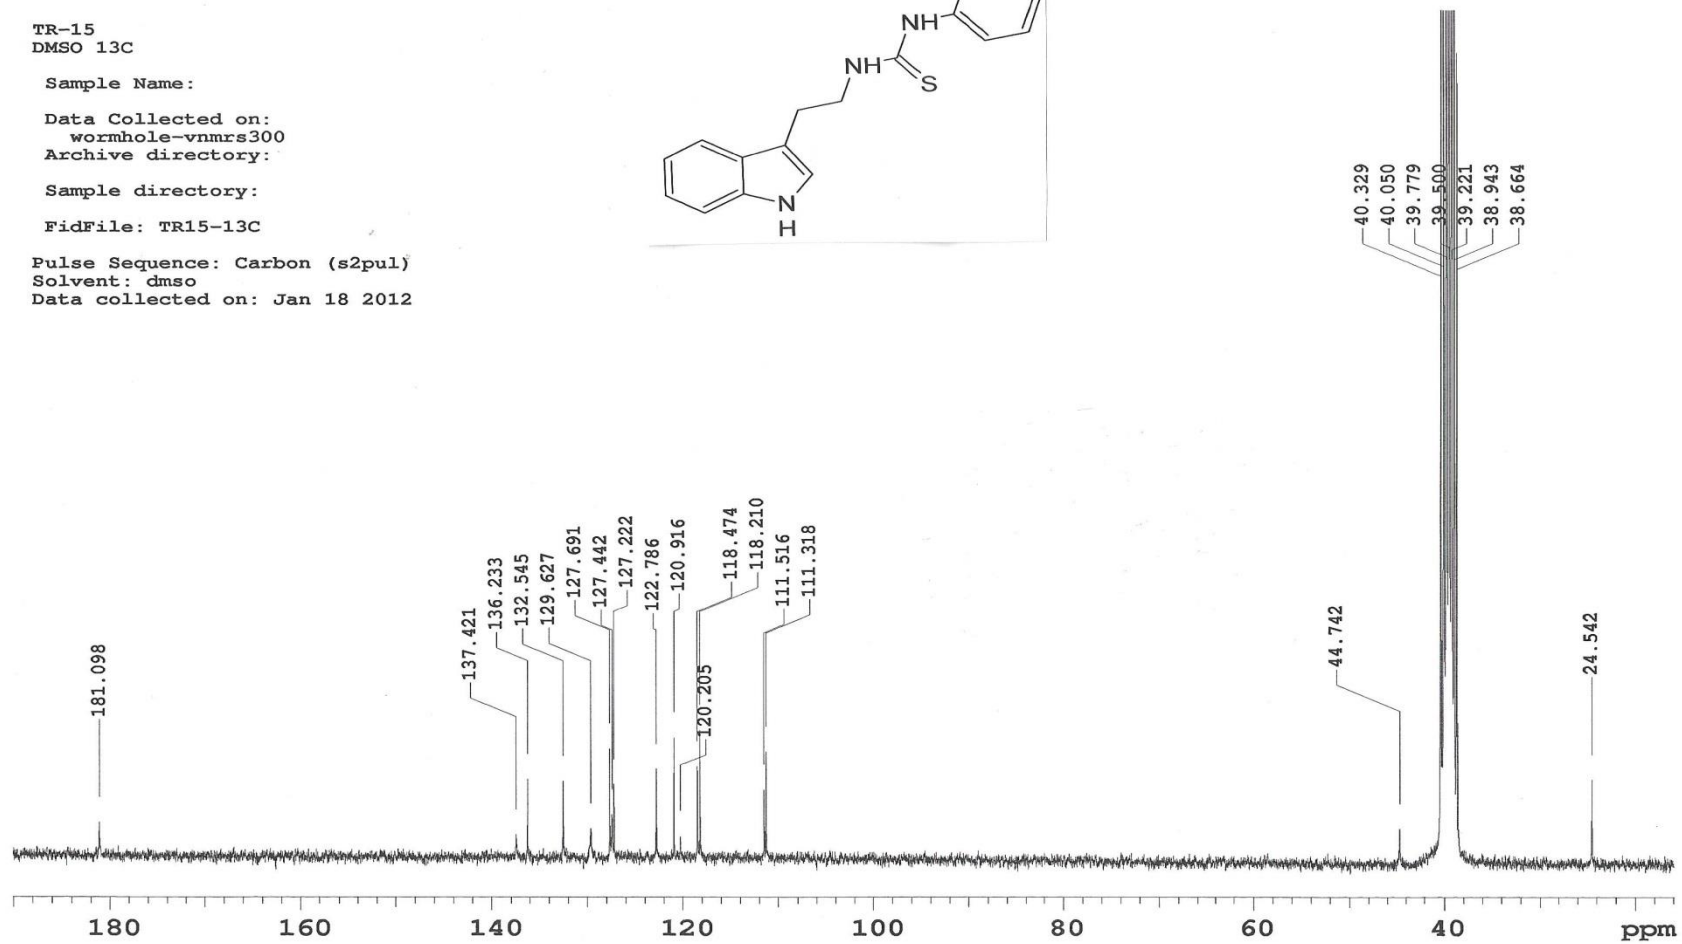

**Spectrum 9.** <sup>1</sup>H NMR of compound **19** (300 MHz, DMSO-d<sub>6</sub>).

DSTr5 w DMSO

Sample Name:

Archive directory:

Sample directory:

FidFile: DSTr5

Pulse Sequence: Proton (s2pul)

Solvent: dms0

Data collected on: Jan 25 2011

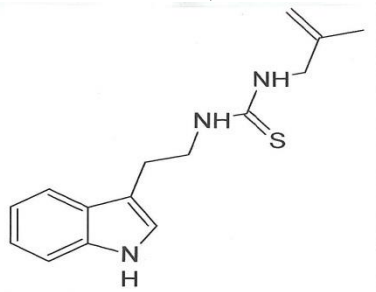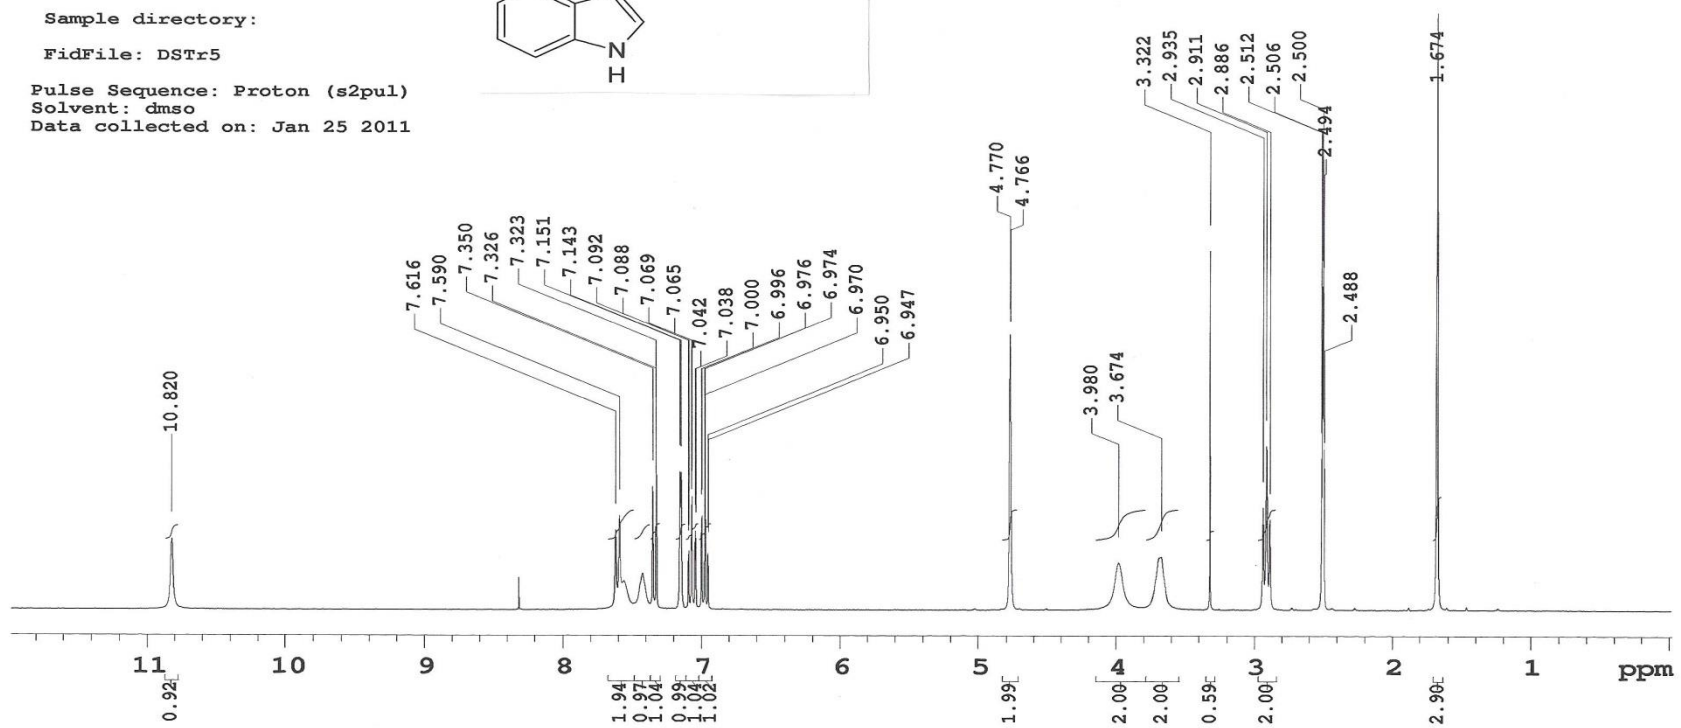

Spectrum 10.  $^{13}\text{C}$  NMR of compound **19** (75.4 MHz, DMSO- $d_6$ ).

TR19 13C-NMR

Sample Name:

Data Collected on:  
wormhole-vnmrs300  
Archive directory:

Sample directory:

FidFile: TR19-13C

Pulse Sequence: Carbon (s2pul)  
Solvent: dms  
Data collected on: Dec 21 2011

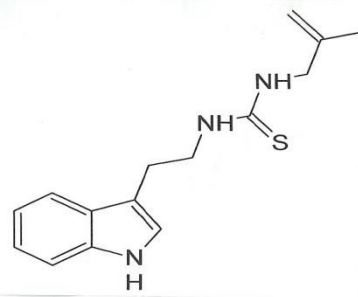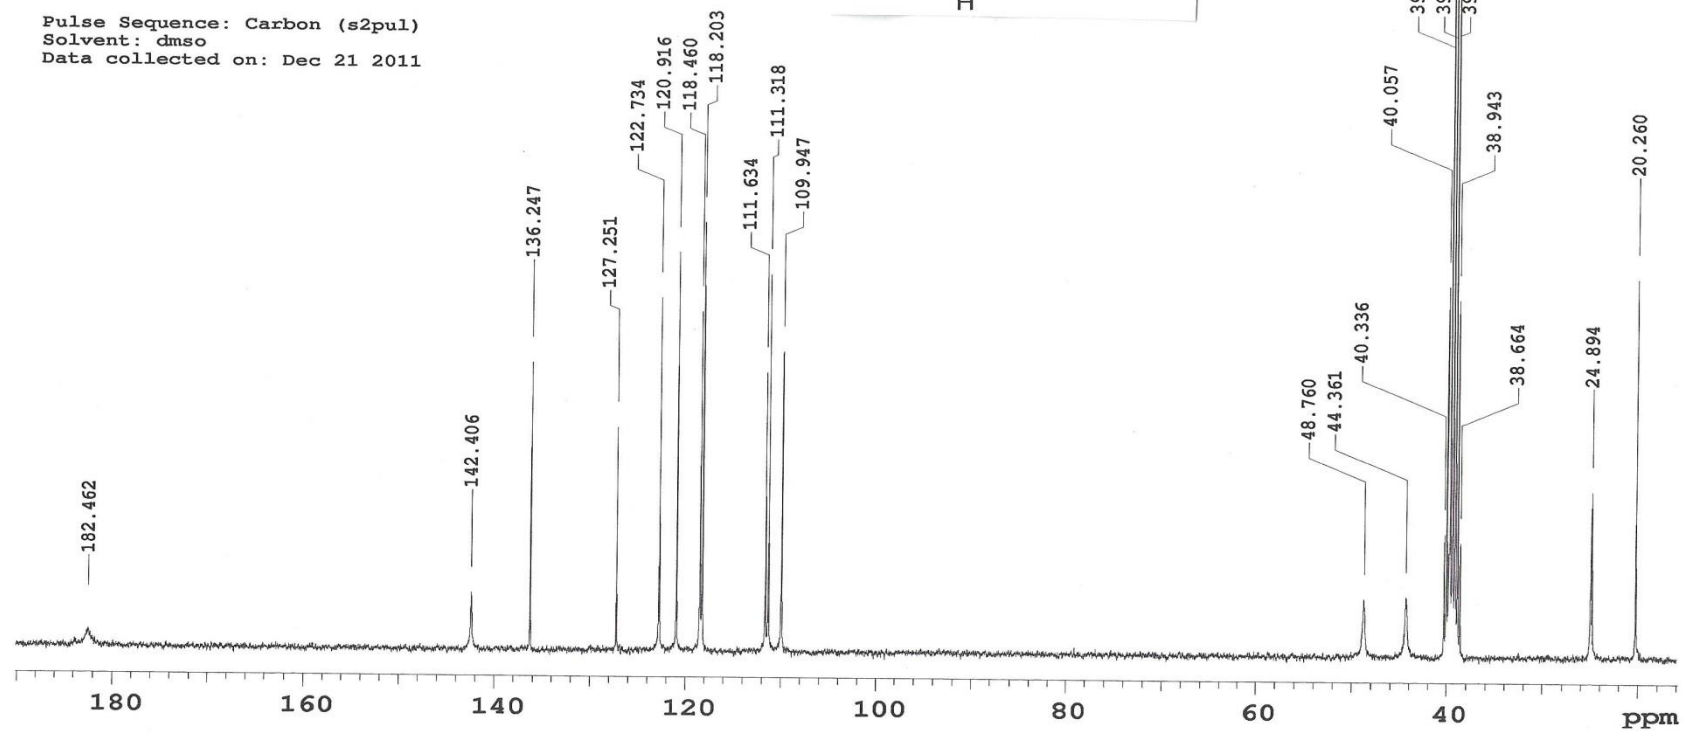

Supplement: molecules-23-02554-s001.pdf [file molecules-23-02554-s001.pdf]
